# Supplementary material for: Urinary EpCAM in urothelial bladder cancer patients: characterisation and evaluation of biomarker potential
Source: PubMed Central journal article supplement — Br J Cancer. 2013 Nov 28;110(3):679–85. doi: 10.1038/bjc.2013.744 (PMC3915119; doi:10.1038/bjc.2013.744), 2013-11-28
Supplement: bjc2013744x2.pdf [file bjc2013744x2.pdf]

## Mass Spectrometry Methods and Results

Mass spectrometry of affinity purified EpCAM: Each digest was analysed using a 60 minute LC-MS/MS run on a maXis impact UHR-TOF mass spectrometer (*Bruker Daltonics*). A 0-40% acetonitrile gradient in 0.1% formic was used to elute peptides from a 25 cm x 75  $\mu$ M C18 Pepmap column (*Dionex*) at 300 nl/min. MASCOT 2.3.0 was used to search the Swiss-Prot human database. Mass tolerances for parent and fragment ions were 10 ppm and 0.01 Da respectively, and only peptides with a MOWSE score >30 were accepted. Carbamidomethylation of cysteines was considered as a fixed modification and deamidation and methionine oxidation as variable modifications. Deglycosylation of tryptic peptides with PNGase was performed after in-gel digestion.

Table S1. Tryptic peptides identified in affinity purified urinary EpCAM. The sequence of each peptide is shown as well as position in the protein (residues = numbering assuming the mature polypeptide has had the signal peptide removed) and MS and MSMS parameters. The peptides in *italic* were only identified following PNGase treatment.

| Sequence                       | Residues      | m/z meas.        | Mr calc.         | z        | $\Delta$ m/z [ppm] | RMS90 [ppm] | Score       | IntCov. [%] | Modifications                                               |
|--------------------------------|---------------|------------------|------------------|----------|--------------------|-------------|-------------|-------------|-------------------------------------------------------------|
| L.AVNCFVNNNR.Q                 | 12-20         | 604.2854         | 1206.5564        | 2        | -0.12              | 2.50        | 43.7        | 35          | Carbamidomethyl: 4                                          |
| K.LAVNCFVNNNR.Q                | 11-21         | 660.8267         | 1319.6405        | 2        | -1.22              | 3.67        | 59.2        | 52          | Carbamidomethyl: 5                                          |
| R.QCQCTSVGAQNTVICSK.L          | 22-38         | 970.9348         | 1939.8550        | 2        | 0.02               | 3.69        | 101.3       | 30          | Carbamidomethyl: 2, 4, 15                                   |
| R.AKPEGALQNNDGLYDPDCDESLFK.A   | 59-83         | 918.4168         | 2752.2286        | 3        | -0.02              | 2.86        | 66.4        | 31          | Carbamidomethyl: 18                                         |
| <i>K.QCNGTSMCWCVNTAGVR</i>     | <i>86-102</i> | <i>1001.4102</i> | <i>2000.7961</i> | <i>2</i> | <i>4.86</i>        | <i>2.18</i> | <i>45.6</i> | <i>32</i>   | <i>Carbamidomethyl: 2, 8, 10, Deamidated 3</i>              |
| <i>K.QCNGTSMCWCVNTAGVR</i>     | <i>86-102</i> | <i>1009.9049</i> | <i>2016.7910</i> | <i>2</i> | <i>497.18</i>      | <i>4.14</i> | <i>82.8</i> | <i>38</i>   | <i>Carbamidomethyl: 2, 8, 10, Deamidated 3, Oxidation;7</i> |
| R.TDKDEITCSEK.V                | 104-115       | 727.8241         | 1453.6355        | 2        | -1.26              | 5.41        | 60.6        | 55          | Carbamidomethyl: 9                                          |
| K.TQNDVDIADVAYYFEK.D           | 180-195       | 946.4342         | 1890.8523        | 2        | 0.80               | 3.92        | 96.8        | 41          | Deamidated: 3                                               |
| K.TQNDVDIADVAYYFEK.D           | 180-195       | 945.9413         | 1889.8683        | 2        | -0.15              | 2.99        | 112.2       | 48          |                                                             |
| K.DVKGESLFHSK.K                | 196-206       | 623.8251         | 1245.6354        | 2        | 0.24               | 5.27        | 53.7        | 30          |                                                             |
| K.KMDLTVNGEQLDLDPGQTLIYYVDEK.A | 207-232       | 1005.1608        | 3012.4638        | 3        | -1.07              | 5.15        | 47.8        | 31          | Oxidation: 2                                                |
| K.APEFSMQGLK.A                 | 233-242       | 554.2776         | 1106.5430        | 2        | -2.15              | 2.38        | 58.6        | 41          |                                                             |
| K.APEFSMQGLK.A                 | 233-243       | 589.7964         | 1177.5801        | 2        | -1.61              | 2.09        | 34.8        | 35          |                                                             |

Table S2. Tryptic peptides identified in affinity purified cell line EpCAM. The peptide marked with an asterisk indicates that the N-terminal signal peptide is 2 residues shorter than shown in UniProtKB. .

The peptides in italic were only identified following PNGase treatment.

| Sequence                      | Residues | m/z meas. | Mr calc.  | z | $\Delta$ m/z [ppm] | RMS90 [ppm] | Scores | IntCov. [%] | Modifications                                         |
|-------------------------------|----------|-----------|-----------|---|--------------------|-------------|--------|-------------|-------------------------------------------------------|
| A.AAQEECVENYK.L*              | -2-10    | 750.8072  | 1499.6021 | 2 | -1.49              | 4.16        | 55.1   | 25          | Carbamidomethyl: 6, 8                                 |
| K.LAVNCFVNNR.Q                | 11-21    | 660.8272  | 1319.6405 | 2 | -0.46              | 1.48        | 82.8   | 61          | Carbamidomethyl: 5                                    |
| K.LAVNCFVNNR.Q                | 11-21    | 661.3199  | 1320.6245 | 2 | 0.59               | 3.96        | 76.7   | 52          | Carbamidomethyl: 5; Deamidated: 4                     |
| LAVNCFVNNR.Q                  | 12-21    | 604.2854  | 1206.5564 | 2 | -0.12              | 2.81        | 51.0   | 43          | Carbamidomethyl: 4                                    |
| R.QQCQTSVGAQNTVCSK.L          | 22-38    | 970.9344  | 1939.855  | 2 | -0.4               | 1.36        | 116.1  | 48          | Carbamidomethyl: 2, 4, 15                             |
| <i>K.CLVMKAEMNGSK.L</i>       | 43-54    | 684.8194  | 1367.6247 | 2 | -0.35              | 2.57        | 40.2   | 18          | Carbamidomethyl: 1; Deamidated: 9                     |
| R.AKPEGALQNNGLYDPDCDESLFK.A   | 59-83    | 918.4168  | 2752.2286 | 3 | -0.02              | 1.18        | 95.3   | 29          | Carbamidomethyl: 18                                   |
| R.AKPEGALQNNGLYDPDCDESLFK.A   | 59-83    | 918.7455  | 2753.2127 | 3 | 0.73               | 1.19        | 65.1   | 28          | Carbamidomethyl: 18; Deamidated: 9                    |
| D.PDCDESLFK.A                 | 74-83    | 584.2531  | 1166.4914 | 2 | 0.22               | 4.61        | 33.5   | 23          | Carbamidomethyl: 3                                    |
| R.RTDKDEITCSEK.V              | 103-115  | 805.8761  | 1609.7366 | 2 | 0.65               | 3.56        | 51.3   | 8           | Carbamidomethyl: 10                                   |
| R.TDKDEITCSEK.V               | 104-115  | 727.8243  | 1453.6355 | 2 | -0.99              | 2.63        | 79.8   | 34          | Carbamidomethyl: 9                                    |
| <i>K.QCNGTSMCWCVNTAGVR</i>    | 86-102   | 1001.4055 | 2000.7961 | 2 | 0.16               | 1.34        | 130.2  | 41          | Carbamidomethyl: 2, 8, 10, Deamidated 3               |
| <i>K.QCNGTSMCWCVNTAGVR</i>    | 86-102   | 1009.4029 | 2016.7910 | 2 | 0.10               | 1.61        | 109.3  | 34          | Carbamidomethyl: 2, 8, 10, Deamidated 3, Oxidation: 7 |
| K.DTEITCSEK.V                 | 107-115  | 555.7398  | 1109.4659 | 2 | -0.77              | 1.75        | 53.8   | 49          | Carbamidomethyl: 6                                    |
| K.TQNDVDIADVAYYFEK.D          | 180-195  | 945.9399  | 1889.8683 | 2 | -1.63              | 3.05        | 102.8  | 47          |                                                       |
| R.TALQKEITR.Y                 | 141-150  | 580.8352  | 1159.6561 | 2 | -0.21              | 1.42        | 67.6   | 39          |                                                       |
| K.TQNDVDIADVAYYFEK.D          | 180-195  | 945.9429  | 1889.8683 | 2 | 1.55               | 1.31        | 121.8  | 59          |                                                       |
| K.TQNDVDIADVAYYFEK.D          | 180-195  | 946.4352  | 1890.8523 | 2 | 1.85               | 1.70        | 115.9  | 43          | Deamidated: 3                                         |
| K.TQNDVDIADVAYYFEKDVK.G       | 180-198  | 745.026   | 2232.0586 | 3 | -1.11              | 6.01        | 25.1   | 23          |                                                       |
| K.TQNDVDIADVAYYFEKDVKG.E      | 180-199  | 764.033   | 2289.0801 | 3 | -1.28              | 3.51        | 64.6   | 35          |                                                       |
| K.DVKGESLFHSK.K               | 196-206  | 623.853   | 1245.6354 | 2 | 0.56               | 6.37        | 52.1   | 31          |                                                       |
| K.GESLFHSK.K                  | 199-206  | 452.7329  | 903.4450  | 2 | 6.86               | 4.48        | 33.7   | 40          |                                                       |
| K.KMDLTVNGEQLDLPGQTLIYYVDEK.A | 207-232  | 1005.1611 | 3012.4638 | 3 | -0.77              | 3.23        | 81.2   | 29          | Oxidation: 2                                          |
| D.PGQTLIYYVDEK.A              | 221-232  | 713.3641  | 1424.7187 | 2 | -3.57              | 2.39        | 62.8   | 35          |                                                       |
| K.APEFSMQGLK.A                | 233-242  | 554.2778  | 1106.543  | 2 | -1.79              | 6.21        | 64.4   | 34          |                                                       |
| K.APEFSMQGLK.A                | 233-242  | 562.2767  | 1122.5379 | 2 | 0.8                | 2.84        | 46.2   | 25          | Oxidation: 6                                          |
| K.AEIKEMGEMHR.E               | 277-287  | 665.8154  | 1329.6169 | 2 | -0.52              | 4.3         | 73.6   | 40          |                                                       |
| K.AEIKEMGEMHR.E               | 277-287  | 673.8136  | 1345.6119 | 2 | 0.59               | 6.67        | 59.5   | 32          | Oxidation: 6                                          |

Table S3. Asp-N peptides identified in affinity purified urinary EpCAM. The peptides which define the major EpCAM shedding cleavage are marked with #.

| Sequence                | Residues | m/z meas. | Mr calc.  | z | $\Delta$ m/z [ppm] | RMS90 [ppm] | Score | IntCov. [%] | Modifications |
|-------------------------|----------|-----------|-----------|---|--------------------|-------------|-------|-------------|---------------|
| Y.DSKSLRTALQKEITTRYQL.D | 135-153  | 751.0835  | 2250.2332 | 3 | -2.01              | 2.09        | 33.9  | 8           |               |
| A.DVAYYFEK.D            | 188-195  | 517.7437  | 1033.4757 | 2 | -2.72              | 1.47        | 40.6  | 43          |               |
| K.DVKGESLFHSKKM.D       | 196-208  | 753.3915  | 1504.7708 | 2 | -1.56              | 2.64        | 75.8  | 16          |               |
| K.DVKGESLFHSKKM.D       | 196-208  | 761.3895  | 1520.7657 | 2 | -0.83              | 4.14        | 69.3  | 19          | Oxidation: 13 |
| V.DEKAPEFSMQGLK.A       | 230-242  | 740.3577  | 1478.7075 | 2 | -4.51              | 4.21        | 36.2  | 29          |               |
| V.DEKAPEFSMQGLK.A#      | 230-243  | 783.8755  | 1565.7396 | 2 | -1.98              | 2.72        | 65.7  | 33          | Oxidation: 9  |
| V.DEKAPEFSMQGLK.A#      | 230-243  | 775.8761  | 1549.7446 | 2 | -4.51              | 2.91        | 78    | 45          |               |

Table S4. Asp-N peptides identified in affinity purified cell line EpCAM.

| Sequence                | Residues | m/z meas. | Mr calc.  | z | $\Delta$ m/z [ppm] | RMS90 [ppm] | Score | IntCov. [%] | Modifications |
|-------------------------|----------|-----------|-----------|---|--------------------|-------------|-------|-------------|---------------|
| C.DESGLFKAKQ.C          | 77-86    | 561.7918  | 1121.5717 | 2 | -2.35              | 4.33        | 61.5  | 28          |               |
| Y.DSKSLRTALQKEITTRYQL.D | 135-153  | 751.0842  | 2250.2332 | 3 | -1.08              | 0.58        | 48.2  | 6           |               |
| L.DPKFITSILY.E          | 154-163  | 598.8311  | 1195.6489 | 2 | -1.03              | 6.95        | 59.5  | 28          |               |
| L.DPKFITSILY.E.N        | 154-164  | 663.3517  | 1324.6915 | 2 | -1.98              | 2.01        | 67.1  | 30          |               |
| V.DIADVAYYFEK.D         | 185-195  | 667.3175  | 1332.6238 | 2 | -2.5               | 4.16        | 31.2  | 19          |               |
| K.DVKGESLFHSHK.M.D      | 196-208  | 753.3923  | 1504.7708 | 2 | -0.5               | 0.86        | 80.5  | 16          |               |
| K.DVKGESLFHSHK.M.D      | 196-208  | 761.3899  | 1520.7657 | 2 | -0.31              | 2.16        | 85    | 22          | Oxidation: 13 |
| G.ESLFHSHK.M.D          | 200-208  | 553.7862  | 1105.559  | 2 | -1.05              | 4.33        | 42.3  | 17          |               |
| L.DPGQTLIYV.D           | 220-229  | 584.7973  | 1167.5812 | 2 | -0.98              | 1.66        | 45.1  | 41          |               |
| Y.EKAEIKEMG.E           | 275-283  | 517.7626  | 1033.5114 | 2 | -0.72              | 1.24        | 42    | 25          |               |
| Y.EKAEIKEMGEMHR.E       | 275-287  | 529.9252  | 1586.7545 | 3 | -0.46              | 2.44        | 45.1  | 8           |               |
| Y.EKAEIKEMGEMHRELNA.-   | 275-291  | 672.3264  | 2013.9612 | 3 | -1.9               | 3.41        | 57.6  | 6           |               |
| A.EIKEMGEMHRELNA.-      | 278-291  | 851.897   | 1701.7814 | 2 | -1.17              | 1.47        | 46.7  | 9           | Oxidation: 8  |
| A.EIKEMGEMHR            | 278-286  | 552.2454  | 1102.4787 | 2 | -2.24              | 1.69        | 34    | 21          |               |
| A.EIKEMGEMHR.E          | 278-287  | 638.2929  | 1274.5747 | 2 | -2.74              | 3.33        | 33.5  | 22          | Oxidation: 5  |
| A.EIKEMGEMHR.E          | 278-287  | 630.2967  | 1258.5798 | 2 | -0.78              | 3.62        | 54.1  | 37          |               |
| A.EIKEMGEMHRELNA.-      | 278-291  | 843.9     | 1685.7865 | 2 | -0.64              | 2.1         | 82.1  | 14          |               |
| K.EMGEMHRELNA.-         | 281-291  | 658.7891  | 1315.5649 | 2 | -0.95              | 1.93        | 60.1  | 17          |               |
| G.EMHRELNA.-            | 284-291  | 500.2408  | 998.4604  | 2 | 6.68               | 28.16       | 38    | 16          |               |
